# Supplementary material for: Combined heterogeneous bio- and chemo-catalysis for dynamic kinetic resolution of (rac)-benzoin
Source: Royal Society of Chemistry journal article supplement (doi:10.1039/c4ra06751g), 2014-01-01
Supplement: c4ra06751g1.pdf [file c4ra06751g1.pdf]

## Combined Heterogeneous Bio- and Chemo-Catalysis for Dynamic Kinetic Resolution of (*rac*)-Benzoin

R. Nieguth,<sup>a</sup> J. ten Dam,<sup>b</sup> A. Petrenz,<sup>c</sup> A. Ramanathan,<sup>b,d</sup> U. Hanefeld,<sup>b</sup> and M. B. Ansorge-Schumacher<sup>a, c, \*</sup>

- <sup>a</sup> Lehrstuhl für Technische Chemie/Enzymtechnologie, Institut für Chemie, Technische Universität Berlin, 10623 Berlin, Germany
- <sup>b</sup> Gebouw voor Scheikunde, Biokatalyse, Afdeling Biotechnologie, Technische Universiteit Delft, Julianalaan 136, 2628 BL Delft, The Netherlands
- <sup>c</sup> Professur für Molekulare Biotechnologie, Institut für Mikrobiologie, Technische Universität Dresden, 01062 Dresden, Germany, Tel: (+) 49 351 463 39518; Fax: (+) 49 351 463 39520, E-mail: [marion.ansorge@tu-dresden.de](mailto:marion.ansorge@tu-dresden.de)
- <sup>d</sup> Center for Environmentally Beneficial Catalysis, The University of Kansas, Lawrence, Kansas 66047, United States

## Supporting Information

### HPLC-Analysis:

All data acquisition for lipase activity in KR, determination of enantiomeric excess and conversion measurements in (D)KR were performed by HPLC analysis. An exemplary HPLC-spectrum is shown in Figure S1). Further details concerning the HPLC-method are given in the experimental section of the main manuscript.

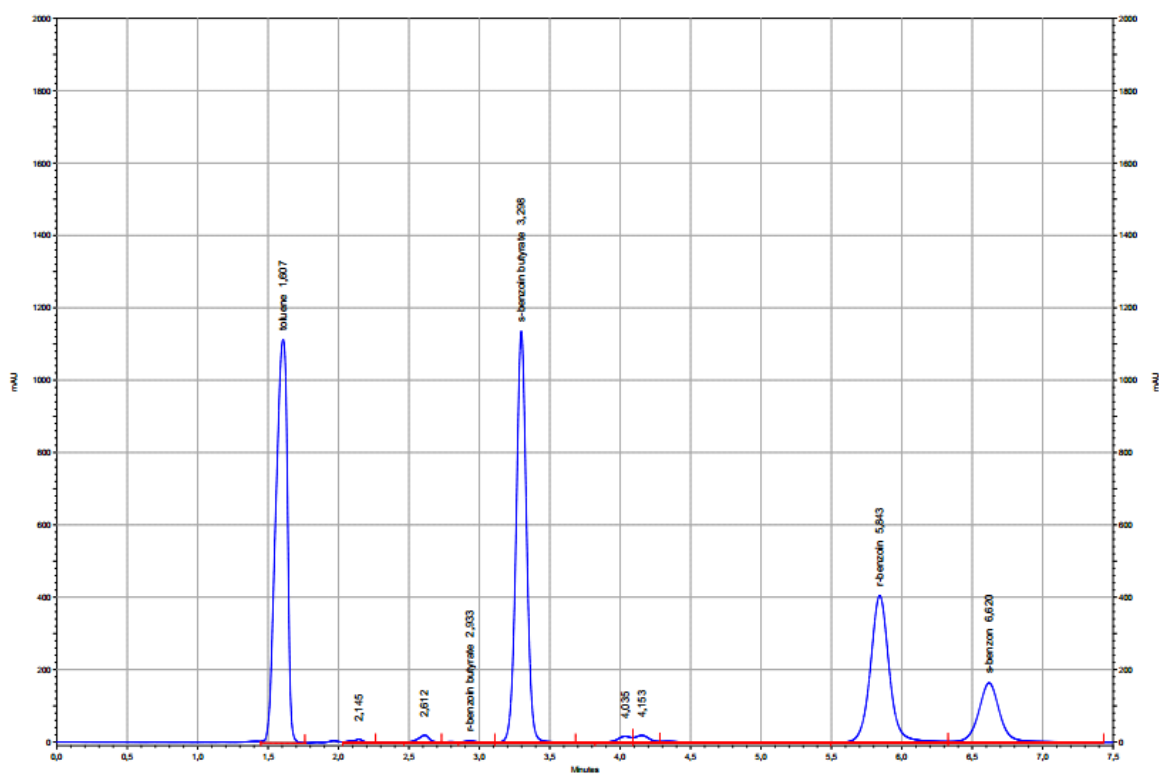

Figure S1. Exemplary HPLC-spectrum during DKR of (*rac*)-benzoin with Acc-LipTL and Zr-TUD-1 (Si/Zr=25) in toluene.

NMR:

Product ester characterization from (D)KR of (*rac*)-benzoin with Acc-LipTL, and in case of DKR with TUD-1 catalyst, was performed via  $^1\text{H-NMR}$ . The corresponding spectrum of benzoin butyrate is given in Figure S2.

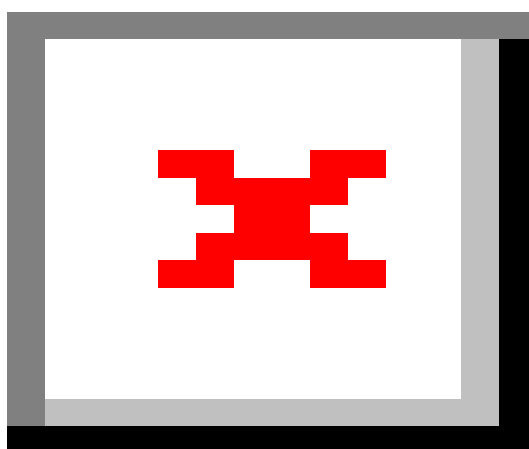

Figure S2. NMR spectrum of benzoin butyrate.

( $^1\text{H-NMR}$  (400 MHz,  $\text{CDCl}_3$ ): 7.92 (m, 2H; Ar-H), 7.55-7.3 (m, 8H; Ar-H), 6.85 (s, 1H; CHO), 2.51-2.39 (m, 2H; CH<sub>2</sub>), 1.74-1.60 (m, 2H; CH<sub>2</sub>), 0.98-0.90 (m, 3H; CH<sub>3</sub>))
